# Supplementary material for: CARD9 Is Required for Classical Macrophage Activation and the Induction of Protective Immunity against Pulmonary Cryptococcosis
Source: PubMed Central journal article supplement (PMC6946806; doi:10.1128/mbio.03005-19), 2020-01-07

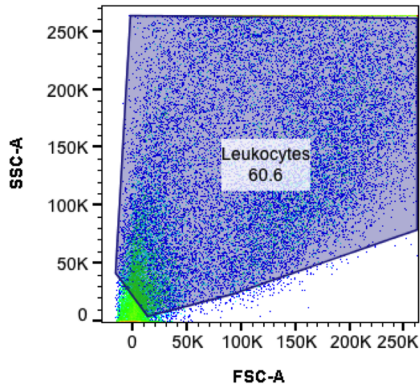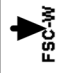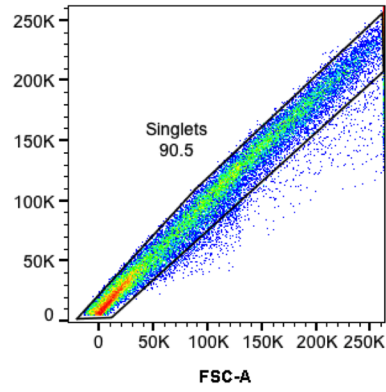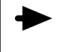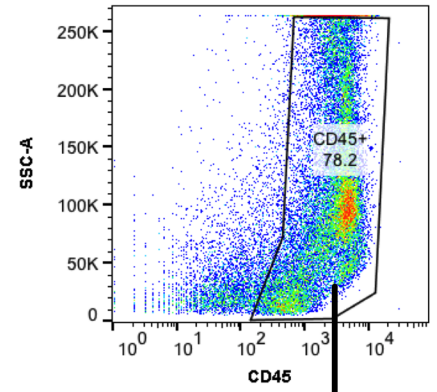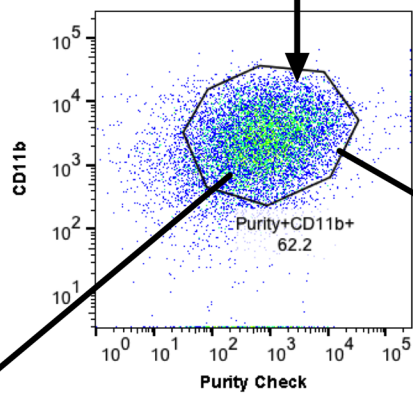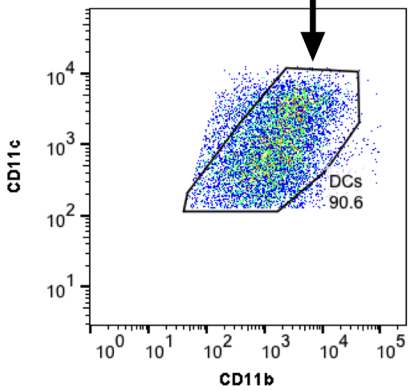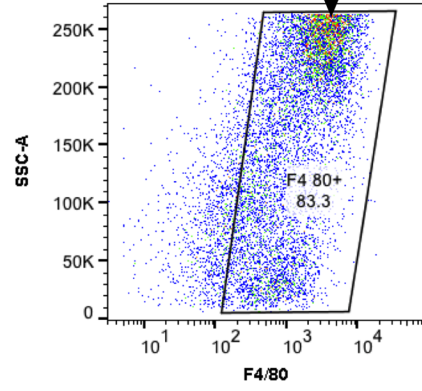

Supplement: mBio.03005-19-sf004.pdf [file mBio.03005-19-sf004.pdf]
